# Supplementary material for: Targeting Parents for Childhood Weight Management: Development of a Theory-Driven and User-Centered Healthy Eating App
Source: PubMed Central journal article supplement (PMC4526951; doi:10.2196/mhealth.3857), 2015-06-18

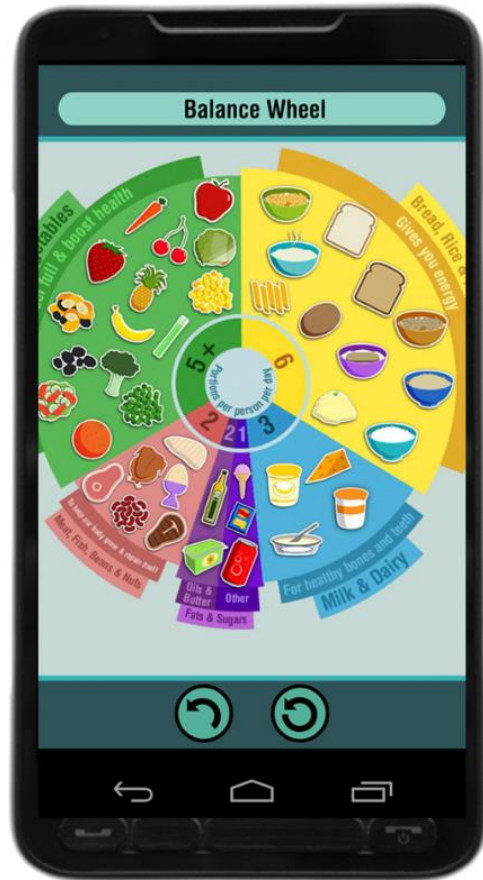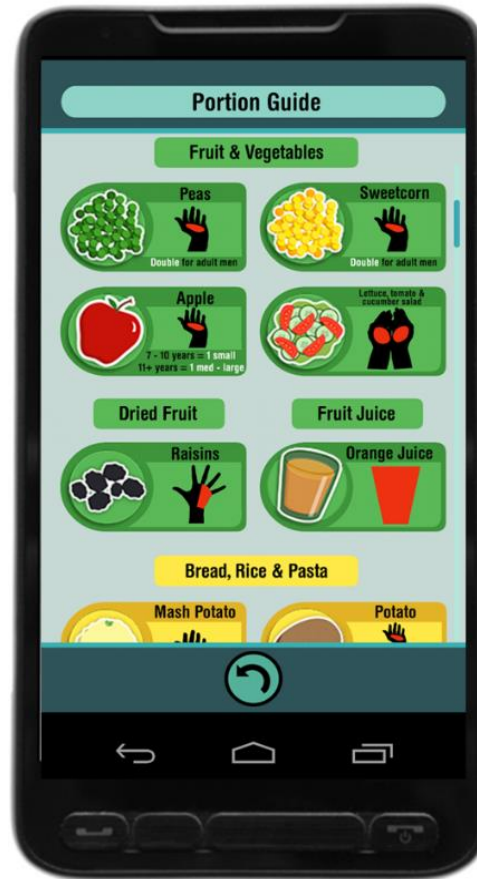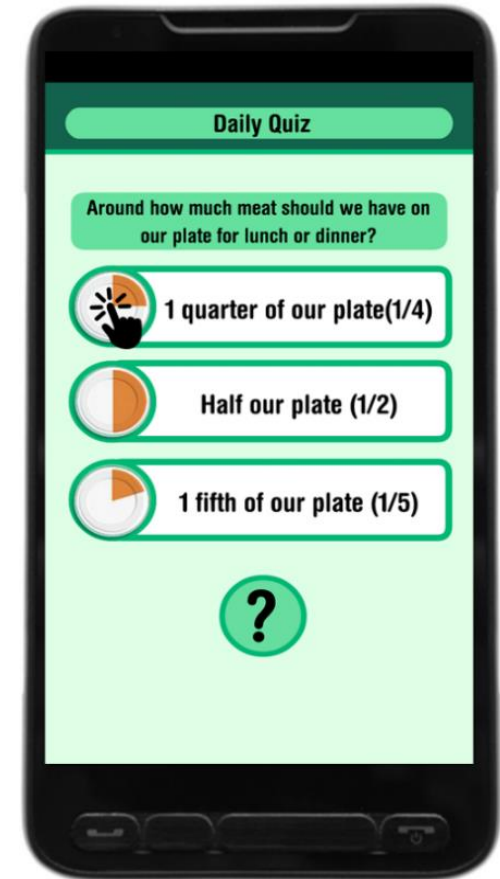

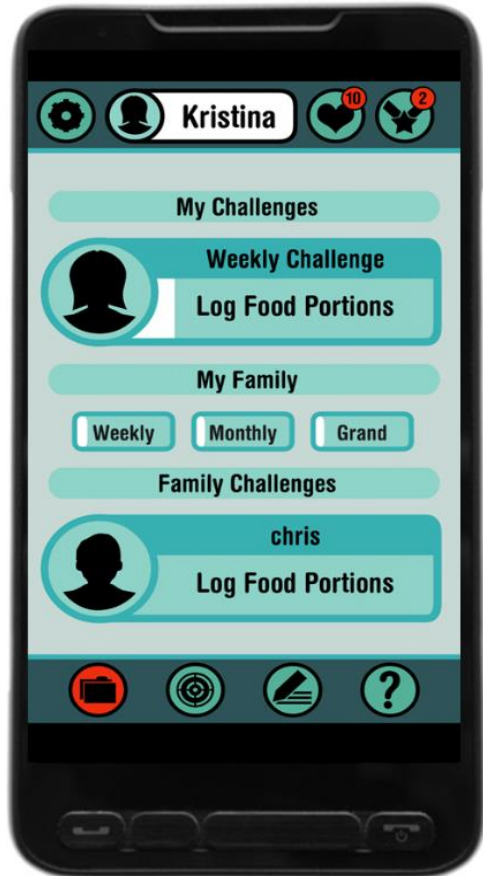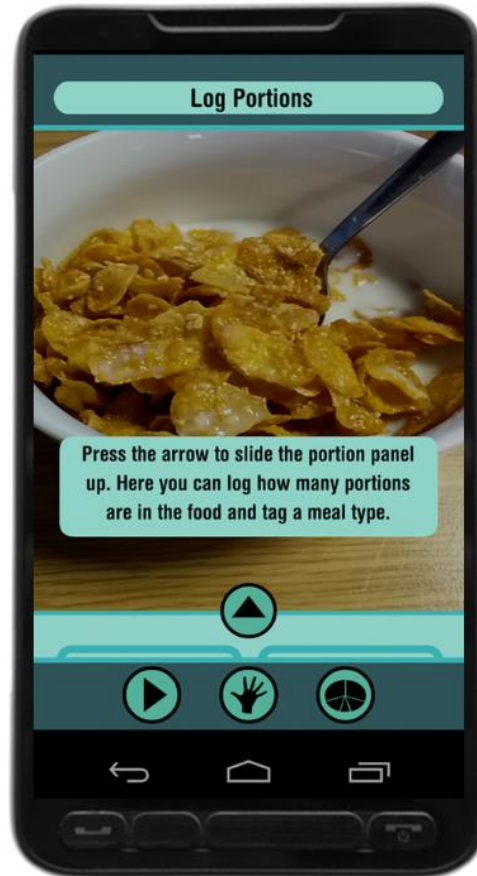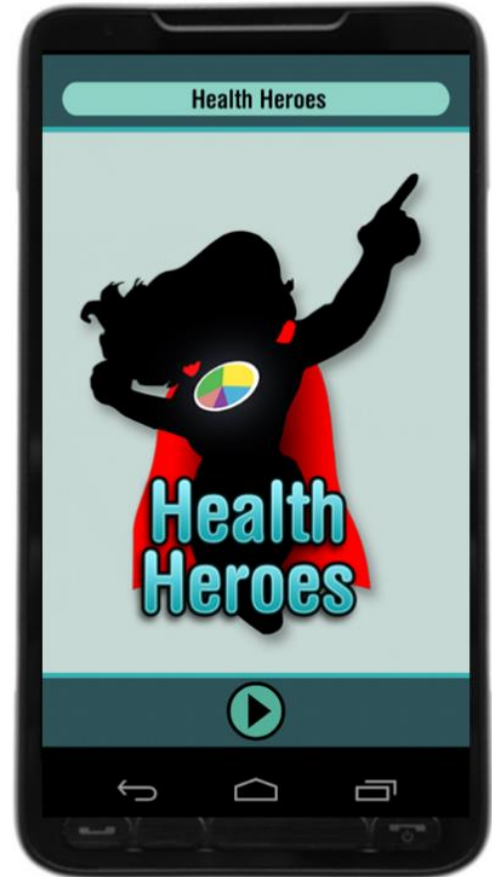

Supplement: mhealth_v3i2e69_app2.pdf [file mhealth_v3i2e69_app2.pdf]
