# Supplementary material for: Targeting Parents for Childhood Weight Management: Development of a Theory-Driven and User-Centered Healthy Eating App
Source: PubMed Central journal article supplement (PMC4526951; doi:10.2196/mhealth.3857), 2015-06-18
Supplement: mhealth_v3i2e69_app3.pdf [file mhealth_v3i2e69_app3.pdf]

| Stage 1 (Steps 1-4)      |                                                                   |                                                                                               | Stage 2 (Steps 5-8)                                                                                      |                                                         |                                                                                                                                                                                                              | Stage 3 (Steps 9-10)                                                          |
|--------------------------|-------------------------------------------------------------------|-----------------------------------------------------------------------------------------------|----------------------------------------------------------------------------------------------------------|---------------------------------------------------------|--------------------------------------------------------------------------------------------------------------------------------------------------------------------------------------------------------------|-------------------------------------------------------------------------------|
| COM-B                    | TDF                                                               | Sub-themes                                                                                    | User preference                                                                                          | Intervention Functions                                  | BCTs                                                                                                                                                                                                         | App features                                                                  |
| Psychological Capability | <b>Knowledge, Memory, attention and decision making processes</b> | Parents lack knowledge and have a difficulty in making decisions on appropriate portion sizes | Time saving and convenience (Quick and simple), visual aids                                              | Education, Training, <i>Environmental restructuring</i> | (2) Provide information on appropriate portion sizes (information provision), (3) Instruction on how to perform the behaviour, (15) Feedback on the behaviour, (13) <i>Adding objects to the environment</i> | Portion guide tool, tips via notifications and in app messages, progress bars |
|                          | <b>Knowledge, Memory, attention and decision making processes</b> | Parents lack knowledge on the balance of food groups                                          | Time saving and convenience (Quick and simple), visual aids, Communication (tools they can use together) | Education, Training                                     | (2) Provide information on portion guidelines for food groups (information provision), (3) Instruction on how to perform the behaviour, (15) Feedback on the behaviour                                       | Balance wheel, tips via notifications and in app messages, food reports       |

|                              |                               |                                                                                                             |                                                                                                                                     |                                 |                                                                                                                                                                                                   |                                                                                                       |
|------------------------------|-------------------------------|-------------------------------------------------------------------------------------------------------------|-------------------------------------------------------------------------------------------------------------------------------------|---------------------------------|---------------------------------------------------------------------------------------------------------------------------------------------------------------------------------------------------|-------------------------------------------------------------------------------------------------------|
|                              | <b>Skills (Cognitive)</b>     | Parents have a difficulty in measuring in food portions                                                     | Time saving and convenience (Quick and simple), visual aids, Communication (tools they can use together)                            | Training                        | (3) Instruction on how to perform the behaviour, (19) Behavioural practice                                                                                                                        | Portion guide tool, tips                                                                              |
|                              | <b>Skills (interpersonal)</b> | Parents have a difficulty in Communicating with their children and partners around eating and weight issues | Communication (tools they can use together), Gamification                                                                           | Enablement                      | (13) Adding objects to the environment                                                                                                                                                            | The app itself is designed to foster communication by being a tool for the family to use together     |
| <b>Reflective Motivation</b> | <b>Behavioural Regulation</b> | Parent's regulation of their own and their children's portion sizes                                         | Minimal data input, quick and simple, tools to use together, visual aids, Gamification-challenge for the whole family to compete in | Training, Enablement, Modelling | (17) Goal setting of behaviour, (11) Self-monitoring of behaviour, (14) Identification of self as a role model (parental modelling) (21) Demonstration of the behaviour, (18) Non-specific reward | Food logging section, goal setting section, Persuasive messages via notifications and in app messages |

|  |                                                                       |                                                                    |                                                                                                          |                        |                                                                                                                                                                                                 |                                                                                                                   |
|--|-----------------------------------------------------------------------|--------------------------------------------------------------------|----------------------------------------------------------------------------------------------------------|------------------------|-------------------------------------------------------------------------------------------------------------------------------------------------------------------------------------------------|-------------------------------------------------------------------------------------------------------------------|
|  | <b>Intentions</b>                                                     | Parents' decisions to take action                                  | Gamification (A challenge for the family to compete in)                                                  | Persuasion             | (1) Commitment                                                                                                                                                                                  | Parents must agree to help their children achieve the target behavior before they begin the challenge             |
|  | <b>Social identity</b>                                                | Role of the Mother                                                 | Communication (tools they can use together), Gamification                                                | Persuasion, Modelling  | (14) Identification of self as a role model, (10) Verbal (text) persuasion about capability                                                                                                     | Persuasive messages via within app text notifications                                                             |
|  | <b>Beliefs about capabilities</b>                                     | Parents have a lack of confidence in their ability to make changes | Time saving and convenience (Quick and simple), visual aids, Communication (tools they can use together) | Persuasion, Training   | (11) Self-monitoring of the behaviour, (17) Goal setting of the behaviour, (15) Feedback on the behaviour, (14) Identification as a role model, (3) instruction on how to perform the behaviour | Persuasive messages via within app text notifications, badges, progress bars, achievements, quiz, nutrition tools |
|  | <b>Beliefs about consequences (childhood overweight and providing</b> | Parents' beliefs of the health risks of childhood overweight       | N/A                                                                                                      | Education, persuasion, | (4) Information about health consequences, (6) Information about social and environmental consequences                                                                                          | Persuasive messages via within app text notifications                                                             |

|                             |                                   |                                                                                                                 |                                                             |                                 |                                                                                                                            |                                                                           |
|-----------------------------|-----------------------------------|-----------------------------------------------------------------------------------------------------------------|-------------------------------------------------------------|---------------------------------|----------------------------------------------------------------------------------------------------------------------------|---------------------------------------------------------------------------|
|                             | <b>appropriate portion sizes)</b> | Parents' belief that portion sizes take too long to measure                                                     | Time saving and convenience (Quick and simple),             | Education, persuasion, Training | (3) Instruction on how to perform the behaviour, (19) Behavioural practice, (10) Verbal (text) persuasion about capability | Portion guide tool, Persuasive messages via within app text notifications |
| <b>Automatic Motivation</b> | <b>Emotions</b>                   | Fear of child becoming anxious about weight/eating disorders if they talk to them about their dietary behaviour | N/A                                                         | Persuasion                      | (4) Information about health consequences, (6) Information about social and environmental consequences                     | Persuasive messages via within app text notifications                     |
|                             |                                   | Denial/recognition of the problem                                                                               | N/A                                                         | Persuasion                      | (4) Information about health consequences, (8) Information about emotional consequences                                    | Persuasive messages via within app text notifications                     |
|                             |                                   | Parents' guilt of restricting food                                                                              | Gamification ( a challenge the whole family can compete in) | Persuasion                      | (8) Information about emotional consequences, (7) Anticipated regret                                                       | Persuasive messages via within app text notifications                     |

|                             |                                            |                                                    |                                                              |                             |                                                          |                                                                                                                                                                                                                                  |
|-----------------------------|--------------------------------------------|----------------------------------------------------|--------------------------------------------------------------|-----------------------------|----------------------------------------------------------|----------------------------------------------------------------------------------------------------------------------------------------------------------------------------------------------------------------------------------|
| <b>Physical opportunity</b> | <b>Environmental context and resources</b> | Parents' resources for measuring portion sizes     | Time saving and convenience (Quick and simple), visual aids, | Environmental restructuring | (13) Adding objects to the environment, (9) Prompts/cues | The App (is an object added to the environment)<br>Resources section - for measuring food portions                                                                                                                               |
| <b>Social opportunity</b>   | <b>Social influences</b>                   | Grandparents like feeding children more food items | Communication (tools they can use together), Gamification    | Enablement                  | (20) Social support (unspecified)                        | The app provides a challenge which the whole family can compete in. Users can send requests via within app messages to other family members to help achieve their goals. The family member receives points for agreeing to help. |
|                             | <b>Social influences</b>                   | Partners provide children with large portions      | Communication (tools they can use together), Gamification    | Enablement                  | (20) Social support (unspecified)                        |                                                                                                                                                                                                                                  |
